# Supplementary material
Source: PubMed Central journal article supplement (PMC7960394)
Supplement: 16-01073.pdf [file 16-01073.pdf]

**On-line Table: Individual radiologic data of the 12 infants, 8 without and 4 with arthrogryposis, included in the study<sup>a</sup>**

| No.                                             | Sex | Age at MRI (day) | Smallest AP Diameters (mm) |               |                       | Largest AP Diameters (mm) |        |          | Vertebral Canal AP Diameter (mm) |        |          | Conus Medullaris Nerve Roots | Grade of Nerve Root Reduction | Congenital Hip Dysplasia |
|-------------------------------------------------|-----|------------------|----------------------------|---------------|-----------------------|---------------------------|--------|----------|----------------------------------|--------|----------|------------------------------|-------------------------------|--------------------------|
|                                                 |     |                  | Cervical                   | High Thoracic | Conus Medullaris Base | Cervical                  | Lumbar | Cervical | Thoracic                         | Lumbar | Thoracic |                              |                               |                          |
| Congenital Zika syndrome without arthrogryposis |     |                  |                            |               |                       |                           |        |          |                                  |        |          |                              |                               |                          |
| 1                                               | F   | 129              | 5.4                        | 4.3           | 6.5                   | 5.5                       | 7.1    | 9.4      | 8.8                              | 11.6   | A < P    | Mild                         | Yes                           |                          |
| 2                                               | M   | 133              | 4.6                        | 3.7           | 5.6                   | 5.3                       | 7.5    | 11.9     | 8.7                              | 13.1   | A < P    | Moderate                     | Yes                           |                          |
| 3                                               | F   | 157              | 5.3                        | 4.2           | 6.5                   | 5.6                       | 7.6    | 10.1     | 12.2                             | 13.6   | A < P    | Mild                         | Yes                           |                          |
| 4                                               | M   | 139              | 6.3                        | 3.6           | 5.9                   | 6.4                       | 7.4    | 10.3     | 10.8                             | 13.1   | Normal   | —                            | No                            |                          |
| 5                                               | M   | 173              | 5.7                        | 4.5           | 6.9                   | 5.7                       | 7.4    | 9.9      | 10.2                             | 11.3   | A < P    | Mild                         | Yes                           |                          |
| 6                                               | F   | 138              | 5.1                        | 4.6           | 6.3                   | 5.7                       | 7.1    | 9.1      | 9.6                              | 11.5   | Normal   | —                            | Yes                           |                          |
| 7                                               | M   | 113              | 3.9                        | 3.4           | 4.6                   | 4.1                       | 5.4    | 9.5      | 11.0                             | 11.1   | A < P    | Moderate                     | No                            |                          |
| 8                                               | M   | 123              | 5.9                        | 3.7           | 6.2                   | 7.0                       | 7.2    | 9.7      | 10.2                             | 11.0   | A < P    | Mild                         | Yes                           |                          |
| Congenital Zika syndrome with arthrogryposis    |     |                  |                            |               |                       |                           |        |          |                                  |        |          |                              |                               |                          |
| 9                                               | F   | 135              | 5.0                        | 3.5           | 5.0                   | 5.1                       | 6.0    | 10.8     | 8.4                              | 11.4   | A < P    | Severe                       | Yes                           |                          |
| 10                                              | M   | 148              | 4.4                        | 2.6           | 3.3                   | 4.6                       | 3.7    | 9.4      | 9.9                              | 12.5   | ANV      | Severe                       | Yes                           |                          |
| 11                                              | M   | 137              | 4.5                        | 4.4           | 4.0                   | 4.5                       | 4.7    | 11.2     | 11.5                             | 11.5   | A < P    | Severe                       | Yes                           |                          |
| 12                                              | F   | 105              | 4.5                        | 3.6           | 4.6                   | 4.8                       | 5.3    | 10.7     | 8.9                              | 11.1   | ANV      | Severe                       | Yes                           |                          |

**Note:**—A indicates anterior root; P, posterior root; AP, anteroposterior; NV, not visualized.

<sup>a</sup> Quantitative data are diameter measures (mm).
